# Supplementary material
Source: PubMed Central journal article supplement (PMC5817459)
Supplement: jamadermatol-153-666-s001.pdf [file jamadermatol-153-666-s001.pdf]

## Supplementary Online Content

Bae JM, Jung HM, Hong BY, et al. Phototherapy for vitiligo: a systematic review and meta-analysis. *JAMA Dermatol*. Published online March 29, 2017.  
doi:10.1001/jamadermatol.2017.0002

**eTable 1.** Predetermined Search Terms in Each Database

**eTable 2.** Interventions and Clinical Outcomes of Phototherapy for Vitiligo

This supplementary material has been provided by the authors to give readers additional information about their work.

**eTable 1. Predetermined Search Terms in Each Database**

| <b>Database</b>  | <b>Search terms</b>                                                                                                                                                                                                                                                                                                                                                                                                      |
|------------------|--------------------------------------------------------------------------------------------------------------------------------------------------------------------------------------------------------------------------------------------------------------------------------------------------------------------------------------------------------------------------------------------------------------------------|
| Pubmed           | vitiligo[title] AND (phototherapy OR psoralen OR PUVA OR ultraviolet OR NBUVB OR narrow band) AND (randomized controlled trial[PT] OR controlled clinical trial[PT] OR randomized[TIAB] OR randomised[TIAB] OR placebo[TIAB] OR randomly[TIAB] OR trial[TIAB] OR controlled[TIAB] OR comparative[TIAB] OR prospective[TIAB])                                                                                             |
| Embase           | vitiligo:ti AND ('phototherapy'/exp OR phototherapy OR 'psoralen'/exp OR psoralen OR 'puva'/exp OR puva OR 'ultraviolet'/exp OR ultraviolet OR nbuvb OR 'NBUVB' OR 'narrow band') AND (randomized AND controlled AND trial OR controlled AND clinical AND trial OR randomized:ab,ti OR randomised:ab,ti OR placebo:ab,ti OR randomly:ab,ti OR trial:ab,ti OR controlled:ab,ti OR comparative:ab,ti OR prospective:ab,ti) |
| Cochrane library | vitiligo AND (phototherapy OR psoralen OR PUVA OR ultraviolet OR NBUVB OR narrow band)                                                                                                                                                                                                                                                                                                                                   |

**eTable 2. Interventions and Clinical Outcomes of Phototherapy for Vitiligo**

| Study                                                 | Country         | Initial dose (mJ/cm <sup>2</sup> ) | Frequency (weekly) | Treatment duration | Enrolled patients | Completed patients | Degree of repigmentation |      |      | Comments                                              |
|-------------------------------------------------------|-----------------|------------------------------------|--------------------|--------------------|-------------------|--------------------|--------------------------|------|------|-------------------------------------------------------|
|                                                       |                 |                                    |                    |                    |                   |                    | ≥75%                     | ≥50% | ≥25% |                                                       |
| <b>A. NB-UVB</b>                                      |                 |                                    |                    |                    |                   |                    |                          |      |      |                                                       |
| Westerhof and Nieuweboer-Krobotova, <sup>8</sup> 1997 | The Netherlands | 75                                 | Twice              | 12 months          | 51                | 51                 | 32                       | ND   | 50   |                                                       |
| Njoo et al, <sup>9</sup> 2000                         | The Netherlands | 250                                | Twice              | 12 months          | 51                | 51                 | 27                       | ND   | 42   |                                                       |
| Al Rubaie, <sup>10</sup> 2002                         | UAE             | ND                                 | ND                 | 6-12 months        | 13                | 13                 | ND                       | 8    | 10   |                                                       |
| Park et al, <sup>11</sup> 2003                        | Korea           | 250                                | Twice              | >6 months          | 13                | 13                 | 7                        | 8    | 11   |                                                       |
| Hamzavi et al, <sup>12</sup> 2004                     | Canada          | 70% of MED                         | Thrice             | 6 months           | 22                | 22                 | 4                        | 9    | 14   |                                                       |
| Brazzelli et al, <sup>13</sup> 2005                   | Italy           | 180-200                            | Thrice             | 6 months           | 10                | 10                 | 5                        | ND   | 8    |                                                       |
| Kanwar and Dogra, <sup>14</sup> 2005                  | India           | 280                                | Thrice             | Up to 12 months    | 26                | 26                 | 15                       | 19   | ND   |                                                       |
| Kanwar et al, <sup>15</sup> 2005                      | India           | 280                                | Thrice             | 12 months          | 15                | 12                 | 8                        | 10   | ND   | Results exclusive of 2 overlapped patients in ref. 13 |
| Anbar et al, <sup>16</sup> 2005                       | The Netherlands | 280                                | Twice              | >6 months          | 135               | 97                 | 47                       | ND   | 73   |                                                       |
| Arca et al, <sup>17</sup> 2006                        | Turkey          | 100                                | Thrice             | 10 weeks           | 24                | 24                 | ND                       | 10   | 19   |                                                       |
| Goktas et al, <sup>18</sup> 2006                      | Turkey          | 140                                | Thrice             | 6 months           | 28                | 28                 | 0                        | 6    | 17   |                                                       |
| Bhatnagar et al, <sup>19</sup> 2007                   | India           | 280                                | Thrice             | 12 months          | 25                | 25                 | 4                        | 13   | 24   |                                                       |
| Dell'Anna et al, <sup>20</sup> 2007                   | The Netherlands | 70% of MED                         | Twice              | 6 months           | 14                | 11                 | 2                        | 4    | ND   |                                                       |
| Nicolaidou et al, <sup>21</sup> 2007                  | Greece          | 200-300                            | Twice              | 12 months          | 84                | 70                 | ND                       | ND   | ND   | Reported outcome according to body site only          |

| <i>Table continued</i>                        |         |     |              |                 |     |     |    |    |    |                                              |
|-----------------------------------------------|---------|-----|--------------|-----------------|-----|-----|----|----|----|----------------------------------------------|
| Sitek et al, <sup>22</sup> 2007               | Norway  | 200 | Thrice       | Up to 12 months | 34  | 31  | 11 | ND | 19 |                                              |
| Yones et al, <sup>23</sup> 2007               | England | 100 | Twice        | 6 months        | 25  | 25  | 8  | 16 | 9  |                                              |
| Percivalle et al, <sup>24</sup> 2008          | Italy   | 330 | Twice        | Up to 12 months | 53  | 53  | 2  | 19 | 36 |                                              |
| Elgoweini and Nour El Din, <sup>25</sup> 2009 | Egypt   | 210 | Thrice       | 6 months        | 12  | 9   | 3  | 5  | 7  |                                              |
| Esfandiarpour et al, <sup>26</sup> 2009       | Iran    | 280 | Thrice       | 3 months        | 25  | 25  | ND | ND | ND | Reported outcome according to body site only |
| Kishan Kumar et al, <sup>27</sup> 2009        | India   | 250 | Twice        | Up to 12 months | 150 | 150 | 26 | ND | 99 |                                              |
| Stinco et al, <sup>28</sup> 2009              | Italy   | 280 | Thrice       | 6 months        | 13  | 13  | ND | ND | ND | Reported outcome according to body site only |
| Yuksel et al, <sup>29</sup> 2009              | Turkey  | 140 | Thrice       | 6 months        | 15  | 15  | 0  | 2  | 10 |                                              |
| Nordal et al, <sup>30</sup> 2011              | Norway  | ND  | Twice/thrice | 3 months        | 46  | 40  | 9  | 11 | 24 |                                              |
| Sapam et al, <sup>31</sup> 2012               | Nepal   | 280 | ND           | 6 months        | 28  | 27  | 0  | 8  | 23 |                                              |
| Bansal et al, <sup>32</sup> 2013              | India   | 330 | Thrice       | 5 months        | ND  | 20  | ND | ND | ND | Reported outcome according to body site only |
| El-Mofty et al, <sup>33</sup> 2013            | Egypt   | 500 | Thrice       | 4 months        | 20  | 19  | 3  | ND | ND |                                              |
| Satyanarayan et al, <sup>34</sup> 2013        | India   | ND  | Thrice       | 6 months        | 2   | 21  | 6  | 11 | 19 |                                              |
| Baldo et al, <sup>35</sup> 2014               | Italy   | ND  | Twice        | 36 weeks        | 48  | 48  | ND | ND | ND | Reported outcome according to body site only |
| Khullar et al, <sup>36</sup> 2014             | India   | 280 | Thrice       | 24 weeks        | 27  | 25  | 6  | 11 | 20 |                                              |

| <i>Table continued</i>                |          |           |        |             |    |    |    |    |    |                                |
|---------------------------------------|----------|-----------|--------|-------------|----|----|----|----|----|--------------------------------|
| <b>B. PUVA</b>                        |          |           |        |             |    |    |    |    |    |                                |
| Al-Aboosi et al, <sup>37</sup> 1995   | Iraq     | 500       | Twice  | 6-18 months | 29 | 18 | 4  | 12 | 17 | Trimethylpsoralen 0.6 mg/kg    |
| Cestari et al, <sup>38</sup> 2000 (A) | Brazil   | 43        | Twice  | 3 months    | 14 | 9  | ND | 0  | 3  | Topical 2% 4-dimethoxyamoidina |
| Cestari et al, <sup>38</sup> 2000 (B) | Brazil   | 43        | Twice  | 3 months    | 13 | 10 | ND | 3  | 4  | Topical 8-MOP                  |
| Ermis et al, <sup>39</sup> 2001       | Turkey   | MED       | Twice  | 3 months    | 35 | 27 | 4  | ND | ND | 8-MOP, 0.5-0.6mg/kg            |
| <i>Table continued</i>                |          |           |        |             |    |    |    |    |    |                                |
| Cherif et al, <sup>40</sup> 2003      | Tunisia  | 500       | Thrice | 15 weeks    | 23 | 23 | ND | 7  | 16 | 8-MOP, 0.6mg/kg                |
| Valkova et al, <sup>41</sup> 2004     | Bulgaria | 1000-1500 | Thrice | 4 months    | 17 | 17 | ND | 9  | ND | 8-MOP, 0.4mg/kg                |
| Bhatnagar et al, <sup>19</sup> 2007   | India    | 2000      | Thrice | 12 months   | 25 | 25 | 2  | 8  | 24 | Trimethylpsoralen 0.6mg/kg     |
| Yones et al, <sup>23</sup> 2007       | England  | 500       | Twice  | 6 months    | 25 | 25 | 5  | 9  | 12 | 8-MOP, 25mg/m <sup>2</sup>     |
| Sapam et al, <sup>31</sup> 2012       | Nepal    | 500-2500  | ND     | 6 months    | 28 | 26 | 0  | 3  | 23 | 8-MOP, 0.6mg/kg                |
| Singh et al, <sup>42</sup> 2013       | India    | 2000      | Thrice | 36 weeks    | 18 | 12 | 5  | 5  | 5  | 8-MOP, 0.6mg/kg                |

Abbreviations: MED, minimal erythema dose; MOP, methoxy-psoralen; ND, not determined;
